# Supplementary material for: Plasmodium falciparum Merozoite Invasion Is Inhibited by Antibodies that Target the PfRh2a and b Binding Domains
Source: PubMed Central journal article supplement (PMC3116812; doi:10.1371/journal.ppat.1002075), 2011-06-16
Supplement: ppat.1002075.s007.pdf [file ppat.1002075.s007.pdf]

GAA AGC TAT GTG ATG AAC AAC AAC CTG TAT CTG CTG CGT GTG AAC GAA GTG AAA AGC ACC CCG ATT GAT CTG TAT CTG AAC CGT GCG AAA GAA CTG CTG G < 100  
E S Y V M N N N L Y L L R V N E V K S T P I D L Y L N R A K E L L E  
CTT TCG ATA CAC TAC TTG TTG TTG GAC ATA GAC GAC GCA CAC TTG CTT CAC TTT TCG TGG GGC TAA CTA GAC ATA GAC TTG GCA GCG TTT CTT GAC GAC C  
10 20 30 40 50 60 70 80 90

AA AGC AGC AGC AAA CTG GTG AAT CCG ATC AAA ATG AAA CTG GGC GAT AAC AAA AAC ATG TAC AGC ATC GGC TAT ATC CAC GAT GAA ATC AAA GAT ATC AT < 200  
S S S K L V N P I K M K L G D N K N M Y S I G Y I H D E I K D I I  
TT TCG TCG TCG TTT GAC CAC TTA GGC TAG TTT TAC TTT GAC CCG CTA TTG TTT TTG TAC ATG TCG TAG CCG ATA TAG GTG CTA CTT TAG TTT CTA TAG TA  
110 120 130 140 150 160 170 180 190

C AAA GCG TAT AAC TTC CAC CTG AAA CAC ATC GAA AAA GGC AAA GAA TAT ATT AAA GCG ATC ACC CAG GCG AAC AAC ATT GCG GAT AAA ATG AAA AAA GAT < 300  
K R Y N F H L K H I E K G K E Y I K R I T Q A N N I A D K M K K D  
G TTT GCG ATA TTG AAG GTG GAC TTT GTG TAG CTT TTT CCG TTT CTT ATA TAA TTT GCG TAG TGG GTC CCG TTG TTG TAA CCG CTA TTT TAC TTT TTT CTA  
210 220 230 240 250 260 270 280 290

GAA CTG ATC AAA AAA ATC TTC GAA AGC AGC AAA CAT TTT GCG AGC TTC AAA TAT AGC AAC GAA ATG ATC AGC AAA CTG GAT AGC CTG TTC ATT AAA AAT G < 400  
E L I K K I F E S S K H F A S F K Y S N E M I S K L D S L F I K N E  
CTT GAC TAG TTT TTT TAG AAG CTT TCG TAG TTT GTA AAA CCG TCG AAG TTT ATA TCG TTG CTT TAC TAG TCG TTT GAC CTA TCG GAC AAG TAA TTT TTA C  
310 320 330 340 350 360 370 380 390

AA GAA ATC CTG AAC AAC CTG TTC AAC AAC ATC TTT AAC ATC TTC AAA AAA AAA TAC GAA ACC TAT GTG GAT ATG AAA ACC ATC GAA AGC AAA TAT ACC AC < 500  
E I L N N L F N N I F N I F K K K Y E T Y V D M K T I E S K Y T T  
TT CTT TAG GAC TTG TTG GAC AAG TTG TTG TAG AAA TTG TAG AAG TTT TTT TTG ATG CTT TGG ATA CAC CTA TAC TTT TGG TAG CTT TCG TTT ATA TGG TTG  
410 420 430 440 450 460 470 480 490

C GTG ATG ACC CTG AGC GAA CAT CTG CTG GAA TAT GCC ATG GAT GTG CTG AAA GCG AAT CCG CAG AAA CCG ATT GAT CCG AAA GCG AAC CTG GAT AGC GAA < 600  
V M T L S E H L L E Y A M D V L K A N P Q K P I D P K A N L D S E  
G CAC TAC TGG GAC TCG CTT GTA GAC GAC CTT ATA CCG TAC CTA CAC GAC TTT CCG TTA GGC GTC TTT GGC TAA GGC TTT CCG TTG GAC CTA TCG CTT  
510 520 530 540 550 560 570 580 590

GTG GTG AAA CTG CAG ATC AAA ATT AAC GAA AAA AGC AAC GAA CTG GAT AAC GCG ATT AGC CAG GTG AAA ACC CTG ATC ATC ATC ATG AAA AGC TTC TAT G < 700  
V V K L Q I K I N E K S N E L D N A I S Q V K T L I I I M K S F Y D  
CAC CAC TTT GAC GTC TAG TTT TAA TTG CTT TTT TCG TTG CTT GAC CTA CAC GAC TTT TTT GCG CAC TTT TGG GAC TAG TAG TAG TAC TTT TCG AAG ATA C  
610 620 630 640 650 660 670 680 690

AT ATC ATC ATC AGC GAA AAA GCG AGC ATG GAT GAA ATG GAA AAA AAA GAA CTG AGC CTG AAC AAC TAC ATC GAA AAA ACC GAT TAT ATC CTG CAG ACC TA < 800  
I I I S E K A S M D E E K K E L S L N N Y I E K T D Y I I Q T Y  
TA TAG TAG TAG TCG CTT TTT CCG TCG TAC CTA CTT TAC CTT TTT TTT GAC TCG GAC TTG TTG ATG TAG CTT TTT TGG CTA ATA TAG GAC TTC GTC ATG  
710 720 730 740 750 760 770 780 790

T AAC ATC TTT AAA AGC AAA AGC AAC ATC ATC AAC AAC AAC AGC AAA AAC ATC AGC AGC AAA TAC ATT ACC ATC GAA GGC CTG AAA AAC GAT ATC GAT GAA < 900  
N I F K S K S N I I N N N S K N I S S K Y I T I E G L K N D I D E  
A TTG TAG AAA TTT TCG TTT TCG TTG TAG TAG TTG TTG TTG TCG TTT TTG TAG TCG TCG TTT ATG TAA TGG TAG CTT CCG GAC TTT TTG CTA TAG CTA CTT  
810 820 830 840 850 860 870 880 890

CTG AAC AGC CTG ATC AGC TAT TTT AAA GAT AGC CAG GAA ACC CTG ATT AAA GAC GAT GAG CTG AAA AAA AAT ATG AAA ACC GAT TAC CTG AAC AAC GTG A < 1000  
L N S L I S Y F K D S Q E T L I K D D E L K K N M K T D Y L N N V K  
GAC TTG TCG GAC TAG TCG ATA AAA TTT CTA TCG GTC CTT TGG GAC TAA TTT CTG CTA CTC GAC TTT TTT TTA TAC TTT TGG CTA ATG GAC TTG TTG CAC T  
910 920 930 940 950 960 970 980 990

AA TAT ATC GAA GAA AAC GTG ACC CAT ATC AAC GAA ATC ATC CTG CTG AAA GAT AGC ATT ACC CAG CGT ATT GCG GAT ATC GAC GAG CTG AAT TCT CTG AA < 1100  
Y I E E N V T H I N E I I L L K D S I T Q R I A D I D E L N S L N  
TT ATA TAG CTT CTT TTG CAC TGG GTA TAG TTG CTT TAG TAG GAC GAC TTT CTA TCG TAA TGG GTC GCA TAA CCG CTA TAG CTG CTC GAC TTA AGA GAC TT  
1010 1020 1030 1040 1050 1060 1070 1080 1090

C CTG ATC AAC ATC AAC GAT TTC ATC AAC GAA AAA AAC ATT AGC CAG GAA AAA GTT AGC TAT AAC CTG AAT AAA CTG TAT AAA GGC AGC TTC GAA GAA CTG < 1200  
L I N I N D F I N E K N I S Q E K V S Y N L N K L Y K G S F E E L  
G GAC TAG TTG TAG TTG CTA AAG TAG TTG CTT TTT TTG TAA TCG GTC CTT TTT CAA TCG ATA TTG GAC TTA TTT GAC ATA TTT CCG TCG AAG CTT CTT GAC  
1110 1120 1130 1140 1150 1160 1170 1180 1190

GAA AGC GAA CTG AGC CAT TTT CTG GAT ACC AAA TAC CTG TTT CAC GAA AAA AAA AGC GTG AAC GAA CTG CAG ACC ATT CTG AAC ACC AGC < 1290  
E S E L S H F L D T K Y L F H E K K S V N E L Q T I L N T S  
CTT TCG CTT GAC TCG GTA AAA GAC CTA TGG TTT ATG GAC AAA GTG CTT TTT TTT TCG CAC TTG CTT GAC GTC TGG TAA GAC TTG TGG TCG  
1210 1220 1230 1240 1250 1260 1270 1280
